# Supplementary material for: Association of childhood trauma with cognitive domains in adult patients with mental disorders and in non-clinical populations: a systematic review
Source: Front Psychol. 2023 Jun 23;14:1156415. doi: 10.3389/fpsyg.2023.1156415 (PMC10327487; doi:10.3389/fpsyg.2023.1156415)
Supplement: Supplementary file 5 [file Data_Sheet_5.xlsx]

## Sheet: Table 1S
Table 1S. Childhood trauma and cognitive functions in patients with Schizophrenia Spectrum and Other Psychotic Disorders.
First Author (Year)	Study Design	Sample source	N (Patients/Healthty Control)	% Female	Mean Age	Mean Years of education	Ethnicity	Psychiatric Disorders	Childhood trauma Domains	Trauma Measures	Cognitive Domains	Cognitive Measures
Aas (2011)	Case-Control	Recruited in Southeast London and Nottingham as part of theÆSOP study	FEP=138 HC=138	FEP=47.1 HC=53.6	FEP=30.6 HC= 32.2	36% no education; 64% different levels of education	196 Whites/52 Blacks/10 Asians/45 Others	FEP	physical and sexual abuse, parent loss or separation	CECA-Q	EF,WM, memory, attention, IQ, language, processing speed, fluency	RAVLT, WMS-R, LNS, TMT, RSPM, WAIS-R ( digit symbol, fluency, vocabulary, block desing)
Aas (a) (2012)	Case-Control	Recruited in Southeast London and Nottingham as part of theÆSOP study	FEP=83 HC=63	FEP=38.5 HC=58.7	FEP=27.40 HC=28	FEP=12.8 HC=14.2	51 Whites/72 Blacks/23 Others	FEP	physical and sexual abuse, parent loss or separation	CECA-Q	general cognition, memory, IQ, language, attention, verbal intelligece, visuo-spatial ability, EF, processing speed	WAIS-R, RAVLT, TMT, RSPM, WMS-R
Aas (b) (2012)	Cross-sectional	Recruited consecutively between 2007 and 2011 from psychiatric units (outpatient and inpatient) in 4 major hospitals in Oslo as part of the larger Thematically Organized Psychosis (TOP) Study	SZ=239	SZ=42.29	SZ=30.7	SZ=13	Norway	SZ	emotional, physical and sexual abuse and emotional and physical neglect	CTQ	memory, WM, EF, perception and visuo-spatial ability, verbal ability, global cognition	CVLT, digit span, verbal and letter fluency test, WASI (block tastk, vocabulary, IQ)
Ayesa-Arriola (2020)	Case-Control	Community and hospital in Spain	FEP=290 HC=52	FEP=45.9 HC= 44.2	FEP=30.46 HC=28.28	FEP=10.69 HC=10.69	Spain	FEP	sexual abuse; physical abuse, death of parent or divorce.	CTES	IQ, memory, WM, EF, processing speed, attention	WAIS III (vocabulary, digit span, digit symbol) CPT, TMT, RAVLT, ROCFT
De-Nardin (2021)	Cross-sectional	Services of the Primary Care Network and Specialty Ambulatories in Brazil	SZ= 105	SZ=42.9	SZ= 40.2	na	Brazil	SZ	emotional, physical and sexual abuse and emotional and physical neglect	CTQ	attention, memory, problem-solving, WM, language	SCoRS
Garcia (2016)	Case-Control	Patients from Hospital university Instituit Pere Mata; healty subject from community	PD=79 HC=58	PD=39.2 HC=48.3	PD=25 HC=24	PD= 13.5 HC=11.5	Spain	PD	emotional, physical and sexual abuse and emotional and physical neglect	CTQ	speed processing, attention/vigilance, working memory,verbal learning, visual learning, reasoning and problem solving	MCCB
Kasznia (2021)	Case-Control	University and general hospital in Poland	SZ=127 HC=56	SZ=52 HC=57.2	SZ=39.1 HC=38.3	SZ=13.2 HC=16.0	Poland	SZ	emotional (antipathy and neglect), physical, or sexual abuse.	CECA-Q	global cognition, memory	RBANS
Kelly (2016)	Cross-sectional	Clinics affiliated with Maryland Psychiatric Research Center	SZ= 80	SZ=30	SZ=32.5	SZ=12.1	60% Whites	SZ	physical abuse	CTQ	global cognition	RBANS
Kilian (2018)	Case-Control	Patients from first admissions to Tygerberg and Stikland hospitals and from community clinics in the greater Cape Town area;healthy controls, from the same catchment area as the patient group through personal contacts and advertisements	SZ=56 HC=52	SZ=25 HC=33	SZ=23.8 HC=25.1	SZ=9.9 HC=10.5	South Africa	SZ	emotional, physical and sexual abuse and emotional and physical neglect	CTQ	speed processing, attention/vigilance, WM,verbal learning, visual learning, reasoning and problem solving	MCCB
Li (2017)	Cross-sectional	In-patients or outpatients from Beijing Anding Hospital and Beijing Daxing Psychiatric Hospital in Beijing, China.	SZ=162	SZ=64.19	SZ=37.8	SZ=11.40	China	SZ	emotional, physical and sexual abuse and emotional and physical neglect	CTQ-SF	global cognition, EF, memory, attention	RBANS
Lysaker (2001)	Cross-sectional	Outpatient from Psychiatry Service of VA Medical Center	SZ=43	SZ=0	SZ=45	SZ=12	33 Caucasians/10 African-Americans	SZ	sexual abuse	clinical interview	global cognition, WM, EF, memory, attention	WCST, CVLT, WAIS III (LNS, digit span, vocabulary test)
Lysaker (2002)	Cross-sectional	Hospital Veterans Affairs Medical Center	SZ= 36	SZ=0	SZ= 46	SZ= 12	24 Whites/11 African-Americans/1 Latin	SZ	abusive parenting, loss,poverty and sexual abuse, neglectful and dysfunctional parenting, sibling loss, socioeconomics status	CAQ	intelligence, attention, EF, verbal memory	WAIS III (vocabulary) CPT, WCST, HVLT
Mansueto (2019)	Cross-sectional	Genetic Risk and Outcome of Psychosis Project (GROUP), Study	PSY=757	PSY=25	PSY=27.66	PSY=13	Netherlands and Belgium	PSY	emotional, physical and sexual abuse and emotional and physical neglect	CTQ-SF	global cognition, WM, EF, memory, attention	WLT, CPT-HQ, WASI III
Mansueto (2018)	Cross-sectional	Universital Hospital	PSY=532	PSY=24	PSY=27.61	PSY=13	Netherlands and Belgium	PSY	emotional, physical and sexual abuse and emotional and physical neglect	CTQ-SF	global cognition, verbal memory, atttention and vigilance,WM	WLT, WAIS-III, CPT-HQ, RST
McCabe (2012)	Case-Control	From Australian Schizophrenia Reserch Bank and Community/support group	SZ=408 HC=267	SZ=34.3 HC=56.6	SZ=40.72 HC=39.27	SZ=13.41 HC=15.41	Australian	SZ	abusive parenting, loss,poverty and sexual abuse, neglectful and dysfunctional parenting, sibling loss, socioeconomics status	CAQ	global cognition, IQ	WTAR, WASI
Mørkved (2020)	Cross-sectional	University hospital in Innsbruck, Stravanger and Bergen	SZ= 78	SZ= 37.2	SZ= 29.4	SZ=12.41	Austria and Norway	SZ	emotional, physical and sexual abuse and emotional and physical neglect	CTQ	memory, verbal and visuospatial abilities, EF,WM, attention, processing speed	WAIS III, D-KEFS, CVLT, CALCAP, WCST, Stroop test, TMT, ROCFT
Quide (2018)	Cross-sectional	Hospital St Vincent	SZ=79 HC=75	SZ=43 HC=45	SZ=42.52 HC=36.13	SZ=14.2 HC=16.7	Australian	SZ	emotional, physical and sexual abuse and emotional and physical neglect	CTQ	WM, EF, attention, memory	LNS, COWAT, RBANS
Schalinski (2018)	Case-Control	Local center of psychiatry	PD=168 HC=50	PD=33.3 HC=44	PD=27.9 HC=26.8	PD=11.4 HC=11.7	Germany	PD	covering abuse (physical, verbal, non-verbal emotional abuse, witnessing interparental abuse and abuse of siblings, peer-related verbal abuse and physical bullying, and intra-, extra-familial or peer-related sexual abuse) and emotional and physical neglect	MACE	speed processing, attention, WM,verbal learning, visual learning, reasoning and problem solving	MCCB
Schenkel (2005)	Cross-sectional	Psychiatric rehabilitation research unit at a state psychiatric hospital	SZ=40	SZ=37.5	SZ=41.9	SZ=12.04	USA	SZ	childhood maltreatment (neglect, physical abuse, sexual abuse,	clinical interview	IQ, global cognition, EF	COWAT, Hayling & Brixton tests, Shipley IQ/WMS III
Shannon (2011)	Cross-sectional	Community	SZ=85	SZ=21.18	SZ=41.1	na	Ireland	SZ	emotional, physical and sexual abuse and emotional and physical neglect	CTQ	IQ, verbal memory, WM	WMS III (word list, logical memory, letter-numeber sequencing), NART
Sideli (2014)	Case-Control	Recruited as part of the National Institute of Health Research Biomedical Research Centre Genetic And Psychosis Study (NIHR-BRC GAP)	FEP=134 HC=125	FEP=35.07 HC=42.4	FEP=29.4 HC=27.9	na	UK	FEP	Physical and sexual abuse, parent loss or separation	CECA-Q	IQ, EF, WM, memory, attention, global cognition	NART, WAIS III, WMS III, TMT, DS
Van Os (2017)	Cohort-Longitudinal	Genetic Risk and Outcome of Psychosis Project (GROUP), Study	PSY=1119 (SZ=940) Siblings of PSY=1059 HC=586	PSY=24 Sibling of PSY=54 HC=53.9	PSY=27.57 Sibling of PSY=27.83 HC=30.42	na	Netherlands and Belgium	PSY	emotional, physical and sexual abuse and emotional and physical neglect	CTQ	IQ	WAIS III
Ruby (2017)	Cross-sectional	New York State Psychiatric Institute Schizophrenia Reserch Unit	SZ= 28	SZ= 28	SZ= 31.50	SZ= 13.15	USA	SZ	general abuse, emotional, physical and sexual abuse	ETI	general cognitive ability, memory (verbal and visula), attention, EF, processing speed, verbal fluency	WAIS-III, WMS-R, WCST, TMT,COWAT
Velikonja (2019)	Case-Control	Outpatient from Psychiatry Medical Center and from community	CHR= 225 HC=127	CHR=40 HC=56.9	CHR= 38.6 HC=32.8	CHR= 14.1 HC=16.1	41 Whites/38 Blacks/132 Asians/7 Others	CHR	emotional, physical and sexual abuse and emotional and physical neglect	CTQ	WM, processing speed, verbal fluency, EF, problem solving, verbal and visuospatial memory	TMT, WMS III, PASAT, HVLT-R, BVMT-R, NAB, category fluency
Velikonja (2021)	Cohort-Longitudinal	North American Promode Longitudinal Study 2	CHR=626 HC=279	CHR=41 HC=49.5	CHR=18.5 HC=19.8	CHR=11.3 HC=12.7	USA	CHR	physical, psychological, or sexual abuse, emotional neglect and bullying	childhood trauma and abuse scale semistructured interview	WM, processing speed, verbal fluency, EF, problem solving, verbal and visuospatial memory, attention	TMT, WMS III, CPT-R, HVLT-R, BVMT-R, NAB, category fluency
Üçok (2015)	Cross-sectional	Patients form clinical in Netherlands and Belgium, control group from fro community	CHR=53	CHR=26.4	CHR=21.10	CHR=10.4	Netherlands and Belgium	CHR	emotional,physical and sexual abuse and emotional and physical neglect	CTQ	memory, EF, WM, attention	RAVL, WCST, WAIS-R, Stroop test, CPT
Wells (2020)	Case-Control	Australian Schizophrenia Reserch Bank	SZ= 534 HC= 635	SZ=40 HC=55.3	SZ=39 HC=41.9	SZ=12.7 HC=15.1	Australian	SZ	abusive parenting, loss,	CAQ	memory, attention	WTAR, RBANS, WAIS III, LNS

## Sheet: Table 2S
Table 2S. Childhood trauma and cognitive functions in patients with mood disorders (Bipolar disorder, Major Depressive disorder, Post Traumatic Stress disorder) and anxiety disorder.
First Author (Year)	Study Design	Sample source	N (Patients/Healthty Control)	% Female	Mean Age	Mean Years of education	Ethnicity	Psychiatric Disorders	Childhood trauma Domains	Trauma Measures	Cognitive Domains	Cognitive Measures
Aas (b) (2012)	Cross-sectional	Recruited consecutively between 2007 and 2011 from psychiatric units (outpatient and inpatient) in 4 major hospitals in Oslo as part of the larger Thematically Organized Psychosis (TOP) Study	BD= 167	BD=42.29	BD=30.7	BD=13	Norway	BD	emotional, physical and sexual abuse and emotional and physical neglect	CTQ	memory, WM, EF, perception and visuo-spatial ability, verbal ability, global cognition	CVLT, digit span, verbal and letter fluency test, WASI (block tastk, vocabulary, IQ)
Bücker (2013)	Case-Control	SystematicTreatment Optimization Program for Early Mania(STOP-EM) at Vancouver Hospital Health Sciences Centre and affiliated sites,and community and hospital referrals from physicians and psychiatrists	BD=64 HC= 28	BD= 56.2 HC= 60.7	BD=22.89 HC= 22.7	BD=14.24 HC= 14.78	Canada	BD	emotional,physical and sexual abuse and emotional and physical neglect	CTQ	IQ, EF, memory, attention, WM	NART, TMT, CVLT, WMS III, CANTAB subtest
Jiménez (2017)	Cross-sectional	Bipolar Disorder Program of the Hospital Clinic of Barcelona and Mental Health Services in Oviedo from the Spanish Research Network on Mental Health (CIBERSAM)	BD=113	BD= 59.29	BD=48	BD=12.8	Spain	BD	emotional, physical and sexual abuse and emotional and physical neglect	CTQ	memory, EF, WM, attention, processing speed	WAIS III, TMT, COWAT, CVLT, ROCF, CTP II, WCST, Stroop test
Hsieh (2021)	Cross-sectional	University hospital	BD=38	BD= 68.4	BD=37.24	BD=14.19	Cina	BD	emotional, physical and sexual abuse and emotional and physical neglect	CTQ	EF	WCST
Poletti (2017)	Case-Control	Clinical source	BD=76 MDD=58 HC= 90	BD=67.1 MDD= 67.2 HC= 36.6	BD=47.75 MMD=48.89 HC= 29.60	BD=11.24 MMD=12.35 HC= 15.73	Italy	BD/MDD	family conﬂict and deﬁcient nurturing experienced	RFQ	attention, WM, EF, processing speed, fluency	BACS, WCST, Tower of London
Quide (2018)	Cross-sectional	Hospital St Vincent	BD=84 HC=75	BD= 64 HC=45	BD=37.47 HC=36.13	BD=16.1 HC=16.7	Australian	BD	emotional, physical and sexual abuse and emotional and physical neglect	CTQ	WM, EF, attention, memory	LNS, COWAT, RBANS
Savitz (2008)	Case-Control	Part of a genetics research project	BD= 68 MDD=77 HC= 65	BD+MDD+HC= 49	BD= 41 MMD=49 HC= 50	BD= 14.92 MMD=14.66 HC=15.19	Caucasian	BD/MDD	emotional, physical and sexual abuse and emotional and physical neglect	CTQ	verbal and visual memory, EF	RAVLT, WCST, SA-WAIS, COWAT, ROCFT, Stroop test
Martins (2019)	Cross-sectional	Bipolar Mood Disorder Program (PROTAHBI) of the Bipolar Mood Disorder Prograsm (HCPA)	BD= 72	BD= 66.67	BD= 46	BD=10.79	Brazil	BD	emotional, physical and sexual abuse and emotional and physical neglect	CTQ	IQ, intelligence	WAIS (vocabulary test, matrix reasoning)
Dannehl (2017)	Case-Control	Outpatient Clinic for Psychological Interventions	MDD=91 HC= 40	MDD=61.1 HC= 66.7	MDD=37.41 HC= 34.32	MDD=10.17 HC= 12.34	Germany	MDD	emotional, physical and sexual abuse and emotional and physical neglect	CTQ	general cognition, memory, processing speed, EF, WM, attention	MMSE, TMT,LM 1 e 2,WAIS (digit span, general knowledge), VLMT, modified card sorting test
Gould (2012)	Case-Control	part of the Conte Center for the Psychobiology of the Early-Life Trauma study	MDD=93	MDD=69	MDD=29.83	na	USA	MDD	Early-life stress, including sexual or physical abuse and neglect	CTQ	memory, WM, EF, attention, processing speed	CANTAB
Chakrabarty (2020)	Case-Control	Canadian Biomarker Integration Network in Depression Study-1 (CAN-BIND-1)	MDD=183 HC=102	MDD= 62 HC=64	MDD= 35 HC=33	MDD= 14.1 HC=15.7	Canada	MDD	emotional (antipathy and neglect), physical, or sexual abuse.	CECA-Q	memory (verbal and visual), processing speed, cognitive flexibility and attention	CNS-VS- computerized battery
Kaczmarczyk (2018)	Case-Control	Specialized depression clinic at the Department of Psychiatry and Psychotherapy, Charité – Universitätsmedizin Berlin, Campus Benjamin Franklin; HC from public posting.	MDD=68 HC=75	MDD=54.4 HC=65.3	MDD=37.4 HC=35.1	MDD=11.6 HC=11.3	Germany	MDD	emotional, physical and sexual abuse and emotional and physical neglect	CTQ	memory, psychomotor speed, EF	RAVLT, ROCFT, TCFT, TMT
Goltermann (2021)	Case-Control	FOR2107 Marburg–Münster Affective Disorders Cohort Study (MACS)	MDD=547 HC=670	MDD=61.4 HC=63.2	MDD=37.28 HC=32.51	na	Germany	MDD	emotional, physical and sexual abuse and emotional and physical neglect	CTQ	WM, EF, processing speed, memory, verbal IQ	Corsi test, LNST, TMT, DSST, VLMT, d2 test, MWT
Saleh (2017)	Case-Control	Duke University and Vanderbilt University	MDD=64. HC=65	MDD=60 HC=66	MDD=35.1 HC=29.7	MDD=15.2 HC=16	79 Whites	MDD	emotional trauma, physical and sexual abuse, neglect, domestic violance, life event stress	SLESQ	WM, EF, processing speed, memory	Benton, RVLT, TMT, Stroop test, Digit span, COWAT
Bremner (1995)	Case-Control	West Haven VA Medical Center	PTSD= 21 HC=20	PTSD= 29 HC=20	PTSD= 39.7 HC=36.7	PTSD= 13.5 HC=14.0	32 Whites/5 Blacks/3 Hispanics/1 Other	PTSD	emotional, physical and sexual abuse	ETI	verbal and visula memory, intelligence	WMS, SRT, WAIS-R
Bremner (2004)	Case-Control	community	PTSD+CT= 18 CT=10 HC=15	100	PTSD+CT= 34 CT=32 HC=32	PTSD+CT= 15 CT=17 HC=17	USA	PTSD	emotional, physical and sexual abuse	ETI	memory, intelligence	WAIS-R, WMS-R (logical and figural memory)
Lantrip (2021)	Cross-sectional	Clinical population from Southern hospital	PTSD= 48	PTSD= 72.92	PTSD= 53.10	PTSD= 4.53	72.9% Caucasian	PTSD	emotional, physical and sexual abuse and emotional and physical neglect	CTQ	EF, WM	BRIEF-A
Nakayama (2020)	Case-Control	Patients from Clinical Hospital in Japan; HC from general community	PTSD= 50 HC= 94	100	PTSD= 38.7 HC= 35	PTSD= 13 HC= 13	Japan	PTSD	emotional, physical and sexual abuse and emotional and physical neglect	CTQ	memory, language, attention	RBANS
Nikulina (2013)	Case-Control	County juvenile (family) or adult criminal courts of a Midwestern metropolitan area	PTSD=792	PTDS=53	PTDS=41,2	PTDS=60% high school	Whites: 61%; Blacks: 32%; Hispanics: 4%; Others: 2.3%	PTSD	abuse and neglect	review of official records processed	EF, non verbal reasoning	TMT A/B, Matrix Reasoning
Pederson (2004)	Case-Control	Community	PTSD= 17 CT=17 HC=17	100	PTSD= 24.8 CT=26.8 HC=23.8	PTSD= 13.7 CT=14.4 HC=15.4	USA	PTSD	emotional, physical and sexual abuse and emotional and physical neglect	CTQ	memory (auditory and visual), WM,	WMS III, Wonderlic personnel test
Stein (1999)	Cross-sectional	Community	PTSD=42	100	TC= 32.6 nTC=29.5	TC= 12.5 nTC=13.7	Canada	PTSD	childhood sexual abuse	phone interview, Structured Clinical Interview for DSM-IV	verbal and visual memory	CVLT, BVRT, WAIS-R
Burri (2013)	Case-Control	Swiss Verdingkind-cohort study	PTSD=22 HC= 74	PTSD+HC=42,7	PTSD+HC=77.5	na	Swiss	PTSD	emotional,physical and sexual abuse and emotional and physical neglect, severe accident/illness, lost a member of family,self-experienced death	CIDCI	memory, intellectual ability, visuo-spatial function, apraxia, verbal and calculation ability, orientation	SIDAM, MMSE, vocabulary test
Rivera-Vélez (2014)	Cross-sectional	Community	PTSD=24	100	29.33	16.83	Latina	PTSD	Physical and sexual abuse	PCSASS	memory, attention, EF	WAIS-III (picture arrangement, LNS, BWD,FWD, difit simbol coding), WMS-III (logical memory, visual reproduction) Color trail test A e B , RAVLT
Petkus (2018)	Case-Control	University of Pittsburgh and community-dwelling	GAD=57 HC=19	GAD=68.4 HC=78.9	GAD=71.75 HC=75.32	GAD=14.12 HC=14.95	USA	GAD	Childhood trauma general, physical, and sexual abuse	ETISR-SF	attention, memory, language, WM, EF, problem solving,	MMSE, WAIS III, RBANS (digit span) , DVT, RAVLTD-KEFS (color-word test and verbal fluency)
Tjoelker (2022)	Cross-sectional	Routine Outcome Monitoring for Geriatric Psychiatry & Science project	Depressive symptoms/ANX= 179	Depressive symptoms/ANX= 48.8	Depressive symptoms/ANX= 69.2	65 lower/61 medium/53 higher	Netherlands	Depressive symptoms/ANX	history of physical, sexual, and psychological abuse, and emotional neglect	structured interview	verbal memory, processing speed,WM, attention, visual learning	10-words verbal memory test, Stroop Colour-Word test, Digit Span, Cogstate Test Battery (Detection Test, Identification Test, One Card Learning Test, One Back Test)

## Sheet: Table 3S
Table 3S. Childhood trauma and cognitive functions in nonclinical samples.
First Author (Year)	Study Design	Sample source	N	% Female	Mean Age	Mean Years of education	Ethnicity	Psychopathology symptoms	Childhood trauma Domains	Trauma Measures	Cognitive Domains	Cognitive Measures
Cromheeke (2014)	Case-Control	Psychology students	38	100	19.8	na	Germany	depression, anxiety	sexual /physical abuse, chidlhood stress	SLESQ	WM	SEMTOS
D'amico (2022)	Cross-sectional	National Survey of Midlife in the United States (MIDUS II) study onducted in 2004–2006 and from the MIDUS Refresher study initiated in 2011	1541	53	53.4	24.1 Bachelor's degree	82.3% Whites/10.9 % Blacks/0.9% Asians/1.6 % American Indians/4.2% Others	depression, anxiety	emotional, physical and sexual abuse and emotional and physical neglect	CTQ	global cognition, episodic memory, EF	BTACT
Daly (2017)	Cross-sectional	College students from private university in Northeastern region of US	110	72	20.4	junior college students	58 Whites/6 Blacks/7 Hispanics/34 Asians/4 Multiracial	depression, anxiety	childhood maltreatment	CTQ-SF	EF, IQ, WM, intelligence	WASI, BRIEF-A, D-kEFS
Feeney (2013)	Cross-sectional	Community-dwelling in Ireland	6707	na	≥ 50 years	42% secondary education	Ireland	depression, anxiety, social problems (e.g. alcoholism)	childhood sexual abuse	SLESQ	global cognition, EF, memory, attention and processing speed	MMSE, MoCA, RCEMDE (subtest), SART
Goldberg (2013)	Cross-sectional	General population (94 monozygotic twin pairs) recruited from the University of Barcelona Twin Registry and media advestisements	188	64.5	34.3	17.08	Barcelona	no	emotional, physical and sexual abuse, physical and emotional neglect, and exposure to household dysfunction (substance abuse, mental illness, violent treatment of mother, criminal behavior, and parental separation or divorce)	ACEQ	verbal and logical memory	WMS III
Grainger (2020)	Cross-sectional	Populaton from the Wave 4 of the Sydney Memory and Aging Study	484	57	83.4	na	Australia	no	early-life stress	CTQ	general cognitive function	Neuropsychological battery
Halpin (2021)	Cross-sectional	Maine-Aging Behavior Learning Enrichment (M-ABLE) Study at the University of main	121	73.60	70.69	15.63	USA	depression and cognitive decline	physical and sexual abuse, emotional and physical neglect, houschold dysfunction	ACEQ	verbal/non verbal intelligence, verbal/visual memory, attention	WRAT-4, PPVT-4, WAIS-IV block desing subtest and digit span, RAVLT,BVMT-R, TMT A-B
Hawkins (2021)	Cohort-Longitudinal	From Add Health, a prospective cohort study of a nationally representative sample of U.S. adolescents followed to adulthood.	12288	na	28.30	na	68.20% Whites/15.52% Blacks/11.92% Hispanics/3.10% Asians/0.50% American Indians/0.76% Others	depression	physical and sexual abuse, neglect	self-report questionnaire	WM, short and long-therm memory	RAVLT, WAIS-IV (digit-span subtest)
Jelicic (2008)	Case-Control	General population recruited through advertisements in local newspapers	94	100	41	na	Netherlands	depression, dissociative experiences	emotional, physical and sexual abuse and emotional and physical neglect	CTQ-SF	memory	30WVLT
Kobayashi (2020)	Cross-sectional	Health and Aging in Africa: a longitudinal study of an INDEPTH Community in South Africa	5059	71	58.9	No education 43%, 1-7 years; 37%, 8-11 years; 12%, +12 years	South Africa	PTSD, depression	traumatic events	interviews structured questionnaires	EF, language, attention, memory, visuospatial ability	OCP-Plus
Korten (2014)	Cohort-Longitudinal	Population from the Longitudinal Aging Study Amsterdam (LASA) study	1312	56.1	75.2	8.81	Netherlands	depression	experience of adverse childhood events (death of parent, excessive alchool use, sexual abuse, severe problems at home, poverty, physical illness)	open-ended questions	general cognitive function, memory, language	Alphabet coding task- 15, AVLT, MMSE
Letkiewicz (2020)	Cross-sectional	Psychological courses of public Midwestern university	162	75.3	18.1	na	USA	mood and anxiety, depression	emotional, physical and sexual abuse and emotional and physical neglect	CTQ	EF, WM	BRIEF-A
Lewis (2021)	Cross-sectional	Environmental Risk (E-Risk) Longitudinal Twin Study	2066	53	18.4	na	UK	general psychopathology	trauma expose during chhildhood (e.g child abuse, bullying, witnessing neighborhood violence)	privat einterview	general intelligence, IQ, WM, processing speed, EF	WAIS-IV (short version), CANTAB subtest
Majer (2010)	Cross-sectional	Healthy adults, selected from a sample of 227 individuals participating in a clinical study of chronic fatigue syndrome (CFS)	47	85.1	51.5	20 Hight school or vocational tech diploma/ 27 associate degree, RN diploma or college	44 Whites/2 Blacks/1 Other	depression, anxiety	emotional, physical/sexual abuse and emotional/physical neglect	CTQ	memory, EF, attention	WRAT-3, CANTAB
Mark (2019)	Cross-sectional	Students from the University of North Dakota	43	100	19.6	undergraduate in psychology	USA	use drugs	psychological, physical and sexual abuse	LPAA, PALA, SALA	EF,WM	WCST, OSPAN Task, CPT, VAPVT
Mert (2016)	Cross-sectional	Students from Cumhuriyet University	345	65.5	20.7	na	Turkey	substance abuse, psychiatrich disorder	emotional, physical and sexual abuse and emotional and physical neglect	CTQ	non-verbal intelligence	RSPM
Navalta (2006)	Cross-sectional	Advertisements (i.e., bulletin board postings, newspaper ads, and subway and bus ads) looking for healthy right-handed individuals interested in participating in “psychiatric research”	26	100	20.0	na	USA	general psycopathology	sexual abuse	TAQ	short-term, verbal and visual memory, verbal and mathematical reasoning skills	MAS, SAT
Perez (1994)	Cohort-Longitudinal	Population from a research project based on a cohorts desing study	691	44	27.53	na	60% Whites	psychiatric disorders	physical and sexual abuse, neglect	information reported by processed cases	IQ, reading ability	QT, WRAT-R
Pesonen (2013)	Cohort-Longitudinal	Men bort at Helsinki Universitary Central Hospital during 1934-1944	279	0	20	na	Finland	no	early life stress (separated temporarily from parent during World War II)	National Archives	verbal, visuo-spatial, arithmetic and logical and general cognitive ability	FDF
Pluck (2011)	Cross-sectional	Homeless adults in the city of Sheffield, UK	55	20	34.3	10.7	UK	dependence of susbance and alcohol	traumatic childhood events	CTQ	frontal function behaviour, IQ	FrSBe,WASI
Ritchie (2011)	Cohort-Longitudinal	community-dwelling of the Montpellier discritc	1282	55	>65 years	na	France	general psychopathology, depression	traumatic events	checklist	visual memory, EF, verbal fluency, verbal memory immediate and delayed, IQ	Benton, TMT-B, Isaacs Ser Test, 5-word test of Dubois, NART
Roberts (2022)	Cohort-Longitudinal	Nurses' Health Study II (USA)	13984	100	61.2	na	98% Whites/0.2% Blacks/0.8% Asians	no	physical, emotional and sexual abuse	CTQ (physical and emotional abuse subscale)/Sexual Maltreatment Scale of the Conflict Tactics Scales (sexual abuse)	WM, attention, EF, psychomotor speed, memory	Cogstate Brief Battery
Syal (2014)	Cross-sectional	Community in South African	55	58	22.3	na	South Africa	general psychopathology, depression	emotional, physical and sexual abuse and emotional and physical neglect	CTQ -SF	visuo-spatial memory	CANTAB
Terock (2020)	Cross-sectional	Community in Germany	5574	51.7	53	53% 10 years	Germany	PTSD, depression, emotional regulation	emotional, physical and sexual abuse and emotional and physical neglect	CTQ	verbal memory	VLMT, NAI

## Sheet: Foglio4
Childhood trauma measures
First Author (Year)	Study Population	Childhood trauma Domains	Trauma Measures
Aas (2011)	FEP	physical and sexual abuse, parent loss or separation	CECA-Q
Aas (a) (2012)	FEP	physical and sexual abuse, parent loss or separation	CECA-Q
Aas (b) (2012)	SZ/BD	emotional, physical and sexual abuse and emotional and physical neglect	CTQ
Ayesa-Arriola (2020)	FEP	sexual abuse; physical abuse, death of parent or divorce.	CTES
Bremner (1995)	PTSD	general abuse, emotional, physical and sexual abuse	ETI
Bremner (2004)	PTSD	general abuse, emotional, physical and sexual abuse	ETI
Bücker (2013)	BD	emotional, physical and sexual abuse and emotional and physical neglect	CTQ
Burri (2013)	PTSD	emotional,physical and sexual abuse and emotional and physical neglect, severe accident/illness, lost a member of family,self-experienced death	CIDCI
Chakrabarty (2020)	MDD	emotional (antipathy and neglect), physical, or sexual abuse.	CECA-Q
Cromheeke (2014)	HC	sexual /physical abuse, chidlhood stress	SLESQ
D'amico (2022)	HC	emotional, physical and sexual abuse and emotional and physical neglect	CTQ
Daly (2017)	HC	childhood maltreatment	CTQ-SF
Dannehl (2017)	MDD	emotional, physical and sexual abuse and emotional and physical neglect	CTQ
De-Nardin (2021)	SZ	emotional, physical and sexual abuse and emotional and physical neglect	CTQ
Feeney (2013)	HC	childhood sexual abuse	SLESQ
Garcia (2016)	PD	emotional, physical and sexual abuse and emotional and physical neglect	CTQ
Gould (2012)	MDD/PTSD	Early-life stress, including sexual or physical abuse and neglect	CTQ
Goltermann (2021)	MDD	emotional, physical and sexual abuse and emotional and physical neglect	CTQ
Goldberg (2013)	HC	emotional, physical and sexual abuse, physical and emotional neglect, and exposure to household dysfunction (substance abuse, mental illness, violent treatment of mother, criminal behavior, and parental separation or divorce)	ACEQ
Grainger (2020)	HC	early-life stress	CTQ
Halpin (2021)	HC	physical and sexual abuse, emotional and physical neglect, houschold dysfunction	ACEQ
Hawkins (2021)	HC	physical and sexual abuse, neglect	self-report questionnaire
Hsieh (2021)	BD	emotional, physical and sexual abuse and emotional and physical neglect	CTQ
Jelicic (2008)	HC	emotional, physical and sexual abuse and emotional and physical neglect	CTQ-SF
Jiménez (2017)	BD	emotional, physical and sexual abuse and emotional and physical neglect	CTQ
Kaczmarczyk (2018)	MDD	emotional, physical and sexual abuse and emotional and physical neglect	CTQ
Kasznia (2021)	SZ	emotional (antipathy and neglect), physical, or sexual abuse.	CECA-Q
Kelly (2016)	SZ	physical abuse	CTQ
Kilian (2018)	SZ	emotional, physical and sexual abuse and emotional and physical neglect	CTQ
Kobayashi (2020)	HC	traumatic events	interviews structured questionnaires
Korten (2014)	HC	experience of adverse childhood events or recent negative life (death of parent, excessive alchool use, sexual abuse, severe problems at home, poverty, physical illness)	open-ended questions
Lantrip (2021)	PTSD	emotional, physical and sexual abuse and emotional and physical neglect	CTQ
Li (2017)	SZ	emotional, physical and sexual abuse and emotional and physical neglect	CTQ-SF
Lysaker (2001)	SZ	sexual abuse	clinical interview
Lysaker (2002)	SZ	abusive parenting, loss,poverty and sexual abuse, neglectful and dysfunctional parenting, sibling loss, socioeconomics status	CAQ
Letkiewicz (2020)	HC	emotional, physical and sexual abuse and emotional and physical neglect	CTQ
Lewis (2021)	HC	trauma expose during chhildhood (e.g child abuse, bullying, witnessing neighborhood violence)	privat einterview
Mansueto (2019)	PSY	emotional, physical and sexual abuse and emotional and physical neglect	CTQ-SF
Mansueto (2018)	PSY	emotional, physical and sexual abuse and emotional and physical neglect	CTQ-SF
McCabe (2012)	SZ	abusive parenting, loss,poverty and sexual abuse, neglectful and dysfunctional parenting, sibling loss, socioeconomics status	CAQ
Majer (2010)	HC	emotional, physical/sexual abuse and emotional/physical neglect	CTQ
Mark (2019)	HC	psychological, physical and sexual abuse	LPAA, PALA, SALA
Martins (2019)	BD	emotional, physical and sexual abuse and emotional and physical neglect	CTQ
Mert (2016)	HC	emotional, physical and sexual abuse and emotional and physical neglect	CTQ
Mørkved (2020)	SZ	emotional, physical and sexual abuse and emotional and physical neglect	CTQ
Navalta (2006)	HC	sexual abuse	TAQ
Nakayama (2020)	PTSD	emotional, physical and sexual abuse and emotional and physical neglect	CTQ
Nikulina (2013)	PTSD	abuse and neglect	review of official records processed
Perez (1994)	HC	physical and sexual abuse, neglect	information reported by processed cases
Pesonen (2013)	HC	early life stress (separated temporarily from parent during World War II)	National Archives
Poletti (2017)	BD/MDD	family conﬂict and deﬁcient nurturing experienced	RFQ
Pederson (2004)	PTSD	emotional, physical and sexual abuse and emotional and physical neglect	CTQ
Petkus (2018)	GAD	Childhood trauma general, physical, and sexual abuse	ETISR-SF
Pluck (2011)	HC	traumatic childhood events	CTQ
Quide (2018)	SZ/BD	emotional, physical and sexual abuse and emotional and physical neglect	CTQ
Ritchie (2011)	HC	traumatic events	checklist
Rivera-Vélez (2014)	PTSD	Physical and sexual abuse	PCSASS
Roberts (2022)	HC	physical, emotional and sexual abuse	CTQ + Sexual Maltreatment Scale of the Conflict Tactics Scales (sexual abuse)
Ruby (2017)	SZ	general abuse, emotional, physical and sexual abuse	ETI
Schalinski (2018)	PD	covering abuse (physical, verbal, non-verbal emotional abuse, witnessing interparental abuse and abuse of siblings, peer-related verbal abuse and physical bullying, and intra-, extra-familial or peer-related sexual abuse) and emotional and physical neglect	MACE
Schenkel (2005)	SZ	childhood maltreatment (neglect, physical abuse, sexual abuse,	clinical interview
Shannon (2011)	SZ	emotional, physical and sexual abuse and emotional and physical neglect	CTQ
Sideli (2014)	FEP	Physical and sexual abuse, parent loss or separation	CECA-Q
Savitz (2008)	BD/MDD	emotional, physical and sexual abuse and emotional and physical neglect	CTQ
Saleh (2017)	MDD	emotional trauma, physical and sexual abuse, neglect, domestic violance, life event stress	SLESQ
Syal (2014)	HC	emotional, physical and sexual abuse and emotional and physical neglect	CTQ -SF
Stein (1999)	PTSD	childhood sexual abuse	phone interview, Structured Clinical Interview for DSM-IV
Terock (2020)	HC	emotional, physical and sexual abuse and emotional and physical neglect	CTQ
Tjoelker (2022)	MDD/GAD	history of physical, sexual, and psychological abuse, and emotional neglect	structured interview
Üçok (2015)	CHR	emotional,physical and sexual abuse and emotional and physical neglect	CTQ
Van Os (2017)	PSY	emotional, physical and sexual abuse and emotional and physical neglect	CTQ
Velikonja (2019)	CHR	emotional, physical and sexual abuse and emotional and physical neglect	CTQ
Velikonja (2021)	CHR	physical, psychological, or sexual abuse, emotional	childhood trauma and abuse scale semistructured interview
Wells (2020)	SZ	abusive parenting, loss, poverty and sexual abuse, neglectful and dysfunctional parenting, sibling loss, socioeconomics status	CAQ

## Sheet: Foglio5
Cognitive domains measures
First Author (Year)	Study Population	Cognitive Domains	Cognitive Measures
Aas (2011)	FEP	EF,WM, memory, attention, IQ, language, processing speed, mental speed, fluency	RAVLT,WMS-R,LNS,TMT,RSPM, WAIS-R( dgit symbol, fluency, vocabulary, block desing)
Aas (a) (2012)	FEP	general cognition, memory, IQ, language, attention, verbal intelligecevisuo-spatial ability, EF, processing speed	WAIS-R, RAVLT, TMT, RSPM, WMS-R
Aas (b) (2012)	SZ/BD	memory, WM, EF, perception and visuo-spatial ability, verbal ability, global cognition	CVLT, digit span, verbal and letter fluency test, WASI (block tastk, vocabulary, IQ)
Ayesa-Arriola (2020)	FEP	IQ, memory, WM, EF, processing speed, attention, motor dexterity	WAIS III (vocabulary, digit span, digit symbol) CPT, TMT, RAVLT, ROCFT
Bremner (1995)	PTSD	verbal and visula memory, intelligence,	WMS, SRT, WAIS-R
Bremner (2004)	PTSD	memory, intelligence	WAIS-R, WMS-R (logical and figural memory)
Bücker (2013)	BD	IQ, EF, memory, attention, WM	NART, TMT, CVLT, WMS III, CANTAB
Burri (2013)	PTSD	memory (immediate and delayed recall, MLT), intellectual ability, visuo-spatial function, aphasia, apraxia, verbal and calculation ability, orientation	SIDAM, MMSE, vocabulary test
Chakrabarty (2020)	MDD	memory (verbal and visual), processing speed, reaction time, cognitive flexibility, and complex attention	CNS-VS- computerized battery
Cromheeke (2014)	HC	WM	SEMTOS
D'amico (2022)	HC	global cognition, episodic memory, executive function	BTACT
Daly (2017)	HC	EF, IQ, WM, intelligence, emotional control	WASI, BRIEF-A, D-kEFS
Dannehl (2017)	MDD	general cognition, memory, processing speed EF, WM, attention	MMSE, TMT,LM 1 e 2,WAIS (digit span, general knowledge), VLMT, modified card sorting test
De-Nardin (2021)	SZ	attention, memory, problem-solving, WM, language, motor skills	SCoRS
Feeney (2013)	HC	global cognition, EF, memory, attention and processing speed	MMSE, MoCA, RCEMDE (subtest), SART
Garcia (2016)	PD	speed processing, attention/vigilance, working memory,verbal learning, visual learning, reasoning and problem solving	MCCB
Gould (2012)	MDD/PTSD	general cognitive function	CANTAB
Goltermann (2021)	MDD	WM, EF, processing speed, memory, verbal IQ	Corsi test, LNST, TMT, DSST, VLMT, d2 test, MWT
Goldberg (2013)	HC	verbal and logical memory	WMS III
Grainger (2020)	HC	general cognitive function	Neuropsychological battery
Halpin (2021)	HC	verbal/non verbal intelligence, verbal/visual memory, executive attention	WRAT-4, PPVT-4, WAIS-IV block desing subtest and digit span, RAVLT,BVMT-R, TMT A-B
Hawkins (2021)	HC	WM, short and long-therm memory	RAVLT, WAIS-IV digit-span subtest
Hsieh (2021)	BD	EF	WCST
Jelicic (2008)	HC	memory	30WVLT
Jiménez (2017)	BD	memory, EF, WM, attention, processing speed	WAIS III, TMT, COWAT, CVLT, ROCFT, CTP II, WCST, Stroop test
Kaczmarczyk (2018)	MDD	memory, psychomotor speed, EF	RAVLT, ROCFT, TCFT, TMT
Kasznia (2021)	SZ	global cognition, memory	RBANS
Kelly (2016)	SZ	global cognition	RBANS
Kilian (2018)	SZ	speed processing, attention/vigilance, WM,verbal learning, visual learning, reasoning and problem solving	MCCB
Kobayashi (2020)	HC	EF, language, attention, memory, visuospatial ability	OCP-Plus
Korten (2014)	HC	general cognitive function, memory, language	Alphabet coding task- 15, AVLT, , MMSE
Lantrip (2021)	PTSD	executive function, WM	BRIEF-A
Li (2017)	SZ	global cognition, EF, memory, attention	RBANS
Lysaker (2001)	SZ	global cognition, WM, EF, memory, attention	WSCT, CVLT, WAIS III( LNS, DS, vocabulary test)
Lysaker (2002)	SZ	intelligence, attention, EF, verbal memory	WAIS III (vocabulary) CPT, WSCT, HVLT
Letkiewicz (2020)	HC	EF, WM	BRIEF-A
Lewis (2021)	HC	general intelligence, IQ, spatial WM, processing speed, executive funcition	WAIS-IV (short version), CANTAB subtest
Mansueto (2019)	PSY	global cognition, WM, EF, memory, attention	WLT, CPT-HQ, WASI III
Mansueto (2018)	PSY	global cognition, verbal memory, atttention and vigilance,WM	WLT, WAIS-III, CPT-HQ, RST
McCabe (2012)	SZ	global cognition	WTAR, WASI
Majer (2010)	HC	memory, EF, attention	WRAT-3, CANTAB
Mark (2019)	HC	EF,WM	WCST, OSPAN Task, CPT, VAPVT
Martins (2019)	BD	IQ, intelligence	WAIS (vocabulary test, matrix reasoning)
Mert (2016)	HC	non-verbal intelligence	RSPM
Mørkved (2020)	SZ	memory, verbal and visuospatial abilities, EF,WM, attention, processing speed	WAIS III, D-KEFS, CVLT, CALCAP, WCST, Stroop test, TMT, ROCFT
Navalta (2006)	HC	short-term, verbal and visual memory, verbal and mathematical reasoning skills	MAS, SAT
Nakayama (2020)	PTSD	memory, language, attention, visuospatial construction	RBANS
Nikulina (2013)	PTSD	EF, non verbal reasoning	TMT A/B, Matrix Reasoning
Perez (1994)	HC	IQ, reading ability	QT, WRAT-R
Pesonen (2013)	HC	verbal, visuo-spatial, arithmetic and logical and general cognitive ability	FDF
Poletti (2017)	BD/MDD	attention, WM, EF, processing speed, fluency	BACS, WCST, Tower of London
Pederson (2004)	PTSD	memory (auditory and visual), WM,	WMS III, Wonderlic personnel test
Petkus (2018)	GAD	attention, memory, language, WM, EF, problem solving,	MMSE, WAIS III, RBANS (digit span) , DVT, RAVLTD-KEFS (color-word test and verbal fluency)
Pluck (2011)	HC	frontal function behaviour, IQ	FrSBe,WASI
Quide (2018)	SZ/BD	WM, executive function, attention, memory	LNS, COWAT, RBANS
Ritchie (2011)	HC	visual memory, EF, verbal fluency, verbal memory immediate and delayed, IQ	Benton, TMT-B, Isaacs Ser Test, 5-word test of Dubois, NART
Rivera-Vélez (2014)	PTSD	memory, attention, EF	WAIS-III (picture arrangement, LNS, BWD,FWD, difit simbol coding), WMS-III (logical memory, visual reproduction) Color trail test A e B , RAVLT
Roberts (2022)	HC	WM, attention, EF, psychomotor speed, memory	Cogstate Brief Battery
Ruby (2017)	SZ	general cognitive ability, memory (verbal and visula), attention, EF, processing speed, verbal fluency	WAIS-III, WMS-R, WCST, TMT,COWAT
Schalinski (2018)	PD	speed processing, attention, working memory,verbal learning, visual learning, reasoning and problem solving	MCCB
Schenkel (2005)	SZ	IQ, global cognition, EF	COWAT, Hayling & Brixton tests, Shipley IQ/WMS III
Shannon (2011)	SZ	IQ, verbal memory, WM	WMS III (word list,logical memory,letter-numeber sequencing), NART
Sideli (2014)	FEP	IQ, EF, WM, memory, attention, global cognition	NART, WAIS III, WMS III, TMT, DS
Savitz (2008)	BD/MDD	verbal and visual memory, EF	RAVLT, WCST, SA-WAIS, COWAT, ROCFT, Stroop test
Saleh (2017)	MDD	WM, EF, processing speed, memory	Benton, RVLT, TMT, Stroop test, Digit span, COWAT
Syal (2014)	HC	visuo-spatial memory	CANTAB
Stein (1999)	PTSD	verbal and visual memory	CVLT, BVRT, WAIS-R
Terock (2020)	HC	verbal memory	VLMT,NAI
Tjoelker (2022)	MMD/GAD	verbal memory, processing speed,WM, attention, visula learning, psychomotor functioning	10-words verbal memory test, Stroop Colour-Word test, Digit Span, Cogstate Test Battery (Detection Test, Identification Test, One Card Learning Test, One Back Test)
Üçok (2015)	CHR	memory, EF, WM, attention	RAVL, WCST, WAIS-R, Stroop test, CPT, Nback
Van Os (2017)	PSY	IQ	WAIS III
Velikonja (2019)	CHR	WM, processing speed, verbal fluency, EF, problem solving, verbal and visuospatial memory	TMT, WMS III, PASAT, HVLT-R, BVMT-R, NAB, category fluency
Velikonja (2021)	CHR	WM, processing speed, verbal fluency, EF, problem solving, verbal and visuospatial memory, attention	TMT, WMS III, CPT-R, HVLT-R, BVMT-R, NAB, category fluency
Wells (2020)	SZ	memory, attention,	WTAR, RBANS, WAIS III, LNS

## Sheet: legend
Legend
Participants				Trauma Tests					Cognitive Domains			Cognitive Tests
ANX= Anxiety				ACEQ=Adverse Childhood Experiences Questionnaire					EF= Executive function			BACS=Brief assessment of cognition in schizophrenia
BD= Bipolar disorder				CAQ= Childhood abuse questionnaire					IQ= Intelligence Quotient			BRIEF-A= Behavior Rating Inventory of Executive Function-adult version
CHR= Clinical risk of psychosis				CECA-Q=Childhood Experiences of Care and Abuse					WM=Working Memory			BVMT-R= Brief Visual Memory Test-Revised
CT= Childhood trauma				CIDCI= composite international diagnostic interview (for trauma)					MLT= Long-Term Memory			BTACT= Brief Test of Adult Cognition by Telephone
FEP= Patients with first-episode psychosis				CTES= Childhood trauma events scale								BVRT= Benton Visual Retention Task
GAD= Generalized anxiety disorder				CTQ= Childhood trauma Questionnaire								CALCAP= California Computerized Assessment Package
HC= Control healty				CTQ-SF= Childhood trauma Questionnaire short form								CANTAB= Cambrige Neuropsycological test automated Battery
MDD= Major depressive disorder				ETI=Early Trauma Inventory								CNS-VS= Central Nervous System Vital Signs
PD=Psychotic disorder				ETISR-SF=Early Trauma Inventory Self Report – Short Form								COWAT= Controlled Oral Word Association Test
PSY= Patients with psychosis				LPAA= Lifetime Report of Physical Abuse								CVLT=Californial Verbal Learning Test
PTSD = Post-traumatic stress disorder				PALA= Lifetime Report of Psychological Abuse								CPT/CPT-HQ=Continuous Performance Test
SZ= Patients with schizophrenia				PCSASS = Psychological Clinical Science Accreditation System								D-kEFS= Delis-Kaplan Executive Function System
				SALA= Lifetime Report of Sexual Abuse								DSST=Digit Symbol Substitution Test
				SLESQ= Stressful Life Events Screening Questionnaire								FDF= Finnish Defense Forces Basic Intellectual Ability Test (military test)
				TAQ= Traumatic Antecedent Questionnaire								FrsBe=Frontal System Behaviour Scale
				RFQ= Risky Families Questionnaire								HVLT/HVLT-R=Hopkins Verbal Learning Test-Revised
				MACE= Maltreatment and Abuse Chronology of Exposure								LNS= Letter–Number Span Test
												LNST= Letter–Number Sequencing Test
												MAS= memory assesment scale
												MCCB=Matricis Consensus Cognitive Battery
												MMSE=Mini-mental state examination
												MoCA=Montreal Cognitive Assessment
												MWT=Multiple choice vocabulary test
												NAI= Nuremberg Age Inventory
												NAB=Neuropsychological Assessment Battery
												NART= National Adult Reading Test
												OCP-Plus= Oxford Cognitive Screen-plus
												OSPAN = Operation Span Task
												PASAT= Paced Auditory Serial Addition Test
												PPVT-4= Peabody Picture Vocabulary Test
												RAVLT/RAVLTD-KEFS= Rey Auditory Verbal Learning Test
												RBANS= Repeatable Battery for the Assessment of Neuropsychological Status
												RCEMDE=Revised Cambridge examination for mental disorders of the elderly
												ROCFT= Rey–Osterrieth Complex Figure Test
												RSPM=Raven's Progressive Matrices
												RST=Response Shifting Task
												SART= Sustained attention to response task
												SAT= Scholastic Apptitude test
												SCoRS= Schizophrenia Cognition Rating Scale
												SEMTOS= Spatial Emotional Match To Sample task
												SIDAM=Structured Interview for the diagnosis of Dementia of the Alzheimer type
												TMT A-B= Trail Making Test
												TCFT= Taylor Complex Figure test
												VAPVT= Visual and Auditory Passive Vigilance Task
												VLMT =Verbal Learning and Memory Test
												WAIS/WAIS-R/WAIS-III/WAIS-IV=Wechsler Adult Intelligence Scale
												WASI=Wechsler Abbreviated Scale of Intelligence (adult)
												WCST=Wisconsin Card Sorting Test
												WLT=Word learning task
												WMS/WMS-R/WSM-III=Wechsler Memory Scale
												WTAR=Wechsler Test of adult reading
												WRAT-3/WRAT-A/WRAT-R= wide-Range-Achievement Test
												30WVLT= adaption of Auditory Verbal Learning Test

## Sheet: Table 4S
Table 4S. Quality and risk of bias assessment results in CT/ELS and Cognition studies in psychopathology using the Newcastle-Ottawa scale
Cross-sectional study
	Selection				Comparability		Outcome
Author, year	Representativeness of the sample	Sample size	Non responders	Ascertainment of exposure (valid measure)	Subjects in different outcome groups are comparable, based on study desing or analysis: confunding factors are controlled		Assessment of the outcome (blinded?)	Statistical test	Total Score ( out of 7)
Stein et al 1999	No	No	No	No	Yes	Yes	Yes	Yes	4
Lysaker et al. 2001	No	No	No	No	Yes	Yes	Yes	Yes	4
Lysaker et al. 2002	No	No	No	Yes	Yes	Yes	Yes	Yes	5
Schenkel et al 2005	Yes	No	No	No	Yes	Yes	Yes	Yes	5
Navalta et al 2006	No	No	No	Yes	Yes	Yes	Yes	Yes	5
Majer et al 2010	Yes	No	No	Yes	Yes	Yes	Yes	Yes	6
Pluck et al 2011	No	No	No	Yes	Yes	Yes	No	Yes	4
Shannon et al. 2011	Yes	No	No	Yes	Yes	Yes	Yes	Yes	6
Aas et al. 2012b	Yes	Yes	No	Yes	Yes	Yes	Yes	Yes	7
Feeney et al 2013	Yes	Yes	No	Yes	Yes	Yes	Yes	Yes	7
Goldberg et al 2013	Yes	Yes	No	Yes	Yes	Yes	No	Yes	6
Syal et al 2014	No	No	No	Yes	Yes	Yes	Yes	Yes	5
Rivera-Vélez et al 2014	Yes	Yes	No	Yes	Yes	Yes	Yes	Yes	7
Ucok et al 2015	No	No	No	Yes	Yes	Yes	Yes	Yes	5
Kelly et al. 2016	Yes	No	No	Yes	Yes	Yes	Yes	Yes	6
Mert et al 2016	No	Yes	No	Yes	Yes	Yes	No	Yes	5
Li et al. 2017	Yes	Yes	No	Yes	Yes	Yes	Yes	Yes	7
Jimenez et al. 2017	Yes	Yes	No	Yes	Yes	Yes	Yes	Yes	7
Daly et al 2017	No	Yes	No	Yes	Yes	Yes	Yes	Yes	6
Ruby et al 2017	Yes	No	No	Yes	Yes	Yes	Yes	Yes	6
Mansueto et al. 2018	Yes	Yes	No	Yes	Yes	Yes	Yes	Yes	7
Quide 2018	Yes	Yes	No	Yes	Yes	Yes	Yes	Yes	7
Martins et al. 2019	Yes	No	No	Yes	Yes	Yes	Yes	Yes	6
Mansueto et al. 2019	Yes	Yes	No	Yes	Yes	Yes	Yes	Yes	7
Mark et al 2019	No	No	No	Yes	Yes	Yes	No	Yes	4
Grainger et al 2020	Yes	Yes	No	Yes	Yes	Yes	No	Yes	6
Kobayashi et al 2020	Yes	Yes	No	No	Yes	Yes	Yes	Yes	6
Letkiewiez et al 2020	No	Yes	No	Yes	Yes	Yes	Yes	Yes	6
Morkved et al. 2020	Yes	No	No	Yes	Yes	Yes	Yes	Yes	6
Terock et al 2020	Yes	Yes	No	Yes	Yes	Yes	Yes	Yes	7
De-Nardi et al. 2021	Yes	Yes	No	Yes	Yes	Yes	Yes	Yes	7
Halpin et al. 2021	Yes	Yes	No	Yes	Yes	Yes	Yes	Yes	7
Hsieh et al. 2021	Yes	Yes	No	Yes	Yes	Yes	Yes	Yes	7
Lantrip et al. 2021	Yes	No	No	Yes	Yes	Yes	Yes	Yes	6
Lewis et al. 2021	Yes	Yes	No	Yes	Yes	Yes	Yes	Yes	7
D'amico et al. 2022	Yes	Yes	No	Yes	Yes	Yes	Yes	Yes	7
Tjoelker et al 2022	Yes	Yes	No	No	Yes	Yes	Yes	Yes	6

## Sheet: Table 5S
Table 5S. Quality and risk of bias assessment results in CT/ELS and Cognition studies in psychopathology using the Newcastle-Ottawa scale
Case-Control study
	Selection				Comparability		Outcome
Author, year	Adequate case definition	Representativeness of case	Control selection	Control definition	Comparability of cases and controls on the basis of the design or analysis		Ascertainment	Same method of ascertainment case control	Non-response rate	Total Score ( out of 9)
Bremmer et al 1995	Yes	No	Yes	Yes	Yes	Yes	Yes	Yes	No	7
Bremmer et al 2004	Yes	No	Yes	Yes	Yes	Yes	Yes	Yes	No	7
Pederson et al 2004	Yes	No	Yes	Yes	Yes	Yes	Yes	Yes	No	7
Jelicic et al 2008	Yes	No	Yes	Yes	Yes	Yes	Yes	Yes	No	7
Savitz et al 2008	Yes	Yes	Yes	Yes	Yes	Yes	Yes	Yes	No	8
Aas et al. 2011	Yes	Yes	Yes	Yes	Yes	Yes	Yes	Yes	No	8
Aas et al. 2012a	Yes	Yes	Yes	Yes	Yes	Yes	Yes	Yes	No	8
McCabe et al. 2012	Yes	Yes	Yes	Yes	Yes	Yes	Yes	Yes	No	8
Gould et al 2012	Yes	Yes	Yes	Yes	Yes	Yes	Yes	Yes	No	8
Burri et al 2013	Yes	Yes	Yes	Yes	Yes	Yes	Yes	Yes	No	8
Bucker et al. 2013	Yes	Yes	Yes	Yes	Yes	Yes	Yes	Yes	No	8
Nikulina et al 2013	Yes	No	No	No	Yes	Yes	No	No	No	3
Sideli et al 2014	Yes	Yes	Yes	Yes	Yes	Yes	Yes	Yes	No	8
Cromheeke et al 2014	Yes	No	Yes	Yes	Yes	Yes	Yes	Yes	No	7
Garcia te al. 2016	Yes	Yes	Yes	Yes	Yes	Yes	Yes	Yes	No	8
Dannehl et al 2017	Yes	Yes	Yes	Yes	Yes	Yes	Yes	Yes	No	8
Poletti et al. 2017	Yes	Yes	Yes	Yes	Yes	Yes	Yes	Yes	No	8
Saleh et al 2017	Yes	Yes	Yes	Yes	Yes	Yes	Yes	Yes	No	8
Schalinski et al. 2018	Yes	Yes	Yes	Yes	Yes	Yes	Yes	Yes	No	8
Kilian et al. 2018	Yes	Yes	Yes	Yes	Yes	Yes	Yes	Yes	No	8
Petkus et al 2018	Yes	Yes	Yes	Yes	Yes	Yes	Yes	Yes	No	8
Kaczmarczyk et al. 2018	Yes	Yes	Yes	Yes	Yes	Yes	Yes	Yes	No	8
Velikonja et al. 2019	Yes	Yes	Yes	Yes	Yes	Yes	Yes	Yes	No	8
Ayesa- Arriola et al. 2020	Yes	Yes	Yes	Yes	Yes	Yes	Yes	Yes	No	8
Chakrabarty et al 2020	Yes	Yes	Yes	Yes	Yes	Yes	Yes	Yes	No	8
Nakayama et al 2020	Yes	No	Yes	Yes	Yes	Yes	Yes	Yes	No	7
Wells et al. 2020	Yes	Yes	Yes	Yes	Yes	Yes	Yes	Yes	No	8
Goltermann et al 2021	Yes	Yes	Yes	Yes	Yes	Yes	Yes	Yes	No	8
Kasnia et al. 2021	Yes	Yes	Yes	Yes	Yes	Yes	Yes	Yes	No	8

## Sheet: Table 6S
Table 6S. Quality and risk of bias assessment results in CT/ELS and Cognition studies in psychopathology using the Newcastle-Ottawa scale
Cohort-Longitudinal study
	Selection				Comparability		Outcome
Author, year	Representativeness of exposed chort	Selection of non-exposed cohort	Ascertainment of exposure	Demostration that outcome was not present at start of study	Comparability of cases and controls on the basis of the design or analysis		Assessment of outcome	Was folllow-up long enough for outcomes to occur?	Adequacy of follow-up of cohorts	Total Score ( out of 9)
Perez et al 1994	No	Yes	No	Yes	Yes	Yes	Yes	Yes	Yes	7
Ritchie et al 2011	Yes	Yes	No	No	Yes	Yes	Yes	Yes	Yes	7
Pesonen et al 2013	Yes	Yes	No	No	Yes	Yes	No	Yes	Yes	6
Korten et al 2014	Yes	Yes	No	No	Yes	Yes	Yes	Yes	Yes	7
Van Os et al 2017	Yes	Yes	Yes	Yes	Yes	Yes	Yes	Yes	Yes	9
Velikonja et al. 2021	Yes	Yes	No	Yes	Yes	Yes	Yes	Yes	Yes	8
Hawkins et al. 2021	Yes	Yes	No	No	Yes	Yes	Yes	Yes	Yes	7
Roberts et al 2022	No	Yes	No	Yes	Yes	Yes	Yes	Yes	Yes	7
